# Supplementary figures and images for: Electrostatic attraction induces cationic covalent-organic framework to pack inorganic acid ions for promoting proton conduction
Source: Royal Society of Chemistry journal article supplement (doi:10.1039/d2cc02051c), 2022-01-01

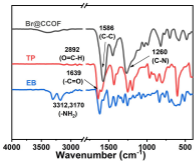

Supplement: d2cc02051c10.pdf [file d2cc02051c10.pdf]

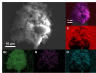

Supplement: d2cc02051c11.pdf [file d2cc02051c11.pdf]

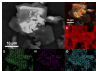

Supplement: d2cc02051c12.pdf [file d2cc02051c12.pdf]

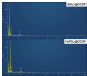

Supplement: d2cc02051c13.pdf [file d2cc02051c13.pdf]

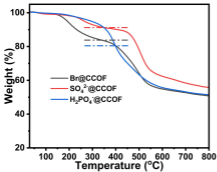

Supplement: d2cc02051c14.pdf [file d2cc02051c14.pdf]

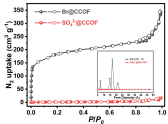

Supplement: d2cc02051c15.pdf [file d2cc02051c15.pdf]

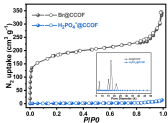

Supplement: d2cc02051c16.pdf [file d2cc02051c16.pdf]

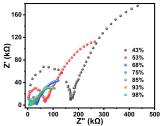

Supplement: d2cc02051c17.pdf [file d2cc02051c17.pdf]

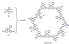

Supplement: d2cc02051c2.pdf [file d2cc02051c2.pdf]

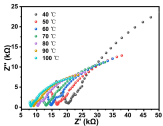

Supplement: d2cc02051c3.pdf [file d2cc02051c3.pdf]

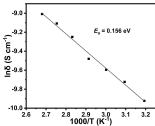

Supplement: d2cc02051c4.pdf [file d2cc02051c4.pdf]

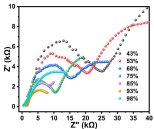

Supplement: d2cc02051c5.pdf [file d2cc02051c5.pdf]

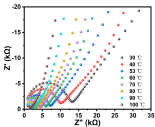

Supplement: d2cc02051c6.pdf [file d2cc02051c6.pdf]

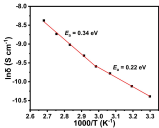

Supplement: d2cc02051c7.pdf [file d2cc02051c7.pdf]

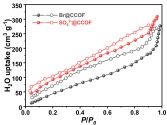

Supplement: d2cc02051c8.pdf [file d2cc02051c8.pdf]

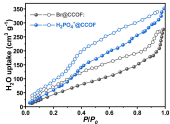

Supplement: d2cc02051c9.pdf [file d2cc02051c9.pdf]
